# Supplementary material
Source: PubMed Central journal article supplement (PMC6068027)
Supplement: 2017.182352.CARTRON_SUPPL.pdf [file 2017.182352.CARTRON_SUPPL.pdf]

**Increased rituximab exposure does not improve response and outcome of patients with chronic lymphocytic leukemia after fludarabine, cyclophosphamide, rituximab. A French Innovative Leukemia Organization (FILO) study**

Guillaume Cartron,<sup>1,2</sup> Rémi Letestu,<sup>3</sup> Caroline Dartigeas,<sup>4</sup> Mira Tout,<sup>5</sup> Béatrice Mahé,<sup>6</sup> Anne-Laure Gagez,<sup>1</sup> Emmanuelle Ferrant,<sup>7</sup> Boris Guiu,<sup>8</sup> Bruno Villemagne,<sup>9</sup> Phan Letuan,<sup>10</sup> Thérèse Aurran,<sup>11</sup> Frédérique Orsini-Piocelle,<sup>12</sup> Anne Banos,<sup>13</sup> Pierre Feugier,<sup>14</sup> Véronique Leblond,<sup>15</sup> Sophie de Guibert,<sup>16</sup> Olivier Tournilhac,<sup>17</sup> Jehan Dupuis,<sup>18</sup> Alain Delmer,<sup>19</sup> Valérie Rouillé,<sup>1</sup> David Ternant<sup>5,20</sup> and Stéphane Leprêtre<sup>21</sup>

<sup>1</sup>Department of clinical hematology, University hospital of Montpellier; <sup>2</sup>CNRS UMR 5235, University of Montpellier; <sup>3</sup>APHP, HUPSSD, Hospital Avicenne, Department of biological hematology, Bobigny; <sup>4</sup>Department of clinical hematology, University hospital of Tours; <sup>5</sup>CNRS UMR 7292, François Rabelais University, University hospital of Tours; <sup>6</sup>Department of clinical hematology, University hospital of Nantes; <sup>7</sup>Department of clinical hematology, University hospital of Dijon; <sup>8</sup>Department of Radiology, University hospital of Montpellier; <sup>9</sup>Department of hematology-oncology, Departmental Hospital La Roche-sur-Yon; <sup>10</sup>Laboratory of Biostatistics, University institute of Clinical Research, Montpellier; <sup>11</sup>Paoli Calmette Center, Marseille; <sup>12</sup>Department of clinical hematology, Hospital of Annecy; <sup>13</sup>Department of clinical hematology, Hospital Côte Basque, Bayonne; <sup>14</sup>Department of clinical hematology, University hospital of Nancy; <sup>15</sup>Department of clinical hematology, UPMC University of Paris 6, GRC11, Hospital La Pitié Salpêtrière; <sup>16</sup>Department of clinical hematology, University hospital of Rennes; <sup>17</sup>Department of clinical hematology, University hospital of Clermont-Ferrand; <sup>18</sup>Fonctional unit Lymphoid malignancies, University hospital Henri Mondor, Créteil; <sup>19</sup>Department of clinical hematology, University hospital of Reims; <sup>20</sup>Laboratory of Pharmacology-Toxicology, CNRS, UMR7292, University hospital of Tours and <sup>21</sup>Inserm U1245 and department of hematology, Henri Becquerel Center and university of Normandy UNIROUEN, Rouen, France

Correspondence: g-cartron@chu-montpellier.fr  
doi:10.3324/haematol.2017.182352

**Supplemental information: material and methods.**

**Increased rituximab exposure does not improve response and outcome of patients with Chronic Lymphocytic Leukemia after Fludarabine, Cyclophosphamide, Rituximab. A French Innovative Leukemia Organization (FILO) Study.**

Guillaume Cartron<sup>1,2</sup>, Rémi Letestu<sup>3</sup>, Caroline Dartigeas<sup>4</sup>, Mira Tout<sup>5</sup>, Béatrice Mahé<sup>6</sup>, Anne-Laure Gagez<sup>1</sup>, Emmanuelle Ferrant<sup>7</sup>, Boris Guiu<sup>8</sup>, Hervé Maisonneuve<sup>9</sup>, Jean-Pierre Daurès<sup>10</sup>, Thérèse Aurrant<sup>11</sup>, Bernadette Coron<sup>12</sup>, Anne Banos<sup>13</sup>, Pierre Feugier<sup>14</sup>, Véronique Leblond<sup>15</sup>, Sophie de Guibert<sup>16</sup>, Olivier Tournilhac<sup>17</sup>, Jehan Dupuis<sup>18</sup>, Alain Delmer<sup>19</sup>, Valérie Rouillé<sup>1</sup>, David Ternant<sup>5,20</sup>, Stéphane Leprêtre<sup>21</sup>.

**Participating centers**

CHU Amiens: Dr B. Royer; CHU Angers: Dr M. Truchan-Graczyk, Dr F. Boyer, Dr M. Dib, Dr C. Foussard, Dr S. Francois, Dr M. Gardembas, Dr F. Genevieve, Dr M. Hunault, Dr A. Schmidt; CH Annecy: Dr F. Orsini-Piocelle, Dr P. Cony-Makhoul, Dr B. Corront, Dr N. Daguindau, Dr A. Parry, Dr C. Reynes; CH Antibes-Juan-les-pins: Dr D. Re; CH V. Dupouy Argenteuil: Dr L. Sutton, Dr A. Aljjakli, Dr P. Genet, Dr V. Morel, Dr T. Touahri; CH Avignon: Dr H. Zerazhi; CH Bayonne: Dr C. Araujo, Dr A. Banos, Dr A. Thannberger; CH Beauvais: Dr K. Ghomari, Dr J.-L. Dutel; H Jean Minjoz Besançon: Dr A. Brion, Dr E. Daguindau, Dr E. Deconinck, Dr P. Delaby, Dr J. Fontan, Dr M. Heczko, Dr P. Helias, Dr J. Vuillier; CH Béziers: Dr A. Saad; H Haut Leveque Pessac: Dr M.-S. Dilhuydy, Dr K. Bouabdallah, Dr G. Harvet, Dr T. Leguay, Pr N. Milpied, Dr A. Pigneux, Dr A. Schmitt, Dr R. Tabriza, Dr S. Vigouroux; CH Boulogne-sur-mer: Dr B. Choufi; CHU Brest: Dr H. Saad, Dr C. Berthou, Dr J.-R. Eveillard; C François Baclesse: Pr J.-P. Vilque, Dr C. Fruchart, Dr D. Musafira; H Louis Pasteur Chartres: Dr M. Maigre, Dr L. Abdelkader-Aljasseem; CHU Clermont-Ferrand: Pr O. Tournilhac, Pr J.-O. Bay, Dr V. Cacheux, Dr C. Chaleteix, Dr B. De Renzis, Dr R. Guieze, Dr E. Hermet, Dr C. Molucon-Chabrot, Dr J. Fleury; H Civils Colmar: Dr M. Belkad; CHSF Corbeil: Dr C. Salanoubat, Dr S. Haiat, Dr B. Joly, Dr C. Petitdidier; CH Henri Mondor: Dr J. Dupuis; CHU Dijon: Dr E. Ferrant, Dr J.-N. Bastie, Dr D. Caillot, Dr O. Casasnovas, Dr I. Lafon, Dr A. Waultier; CHU Grenoble: Dr L. Molina, Dr C.-E. Bulabois, Pr J.-Y. Cahn, Dr S. Courby, Dr F. Garban, Dr R. Gressin, Dr B. Pegourie, Dr A. Thiebaut; CHD La-Roche-sur-Yon: Dr M. Tiab, Dr T. Chatellier, Dr T.

L'haridon, Dr H. Maisonneuve, Dr F. Priou, Dr B. Villemagne; CH Le Mans: Dr N. Denizon, Dr K. Le Du; CHRU Lille: Dr B. Cazin, Dr M. Wemeau; CHU Limoges: Dr D. Bordessoule, Dr M.-P. Gourin, Dr A. Jaccard, Dr S. Moreau, Dr L. Remenieas, Dr M. Touati, Dr P. Turlure; CH Lorient: Dr P. Moreau, Dr M.-F. Le Coz, Dr O. Luycx, Dr M. Niault; C Léon Bérard Lyon: Dr C. Sebban; Institut Paoli-Calmettes Marseille: Dr T. Aurran-Schleinitz; CHU Marseille: Dr R. Costello, Dr G. Sebahoun; CH Meaux: Dr W. Abarah, Dr I. Mahfouz ; H Notre Dame De Bon Secours Metz : Dr I. Guibaud, Dr B. Christian, Dr V. Dorvaux, Dr S; Visanica; CHU Montpellier: Pr G. Cartron, Dr C. Autrand, Dr R. Navarro, Dr G. Olivier, Dr P. Quittet; CH Mulhouse: Dr B. Drenou, Dr J.-C. Eisenmann, Dr Y. Arkam, Dr M. Ojeda-Urbe; CHU Nantes: Dr B. Mahe, Dr S. Ayari, Dr N. Blin, Dr P. Chevallier, Dr J. Delaunay, Dr V. Dubruille, Dr T. Gasinne, Dr T. Guillaume, Dr S. Le Gouill, Dr P. Moreau, Pr M. Mohty, Dr V. Roland; C Catherine De Sienne Nantes: Dr N. Morineau; C Antoine Lacassagne Nice: Dr D. Re; CHU Nimes: Dr E. Jourdan, Dr P. Bourquard, Dr B. Richard, Dr S. Wickenhauser; CHR Orléans: Dr M. Alexis, Dr M. Schoenwald; H Avicenne Bobigny: Pr F. Cymbalista, Dr V. Levy; H Hotel Dieu Paris: Pr F. Dreyfus, Dr S. park; H La Pitié Salpêtrière Paris: Pr V. Leblond; H Saint Antoine Paris: Dr Z. Marjanovis, Dr A. Verhoff; H Saint Louis Paris: Dr J.-M. Zini; CH Perpignan: Dr L. Sanhes, Dr S. Burcheri, Dr A. Karangwa; CHU La Miletrie Poitiers: Dr B. Dreyfus; CH Pontoise: Dr H. Gonzalez, Dr R. Benramdane, Dr L. Fouillard; CHU Reims: Pr A. Delmer; CHU Rennes: Pr T. Lamy, Dr M. Bernard, Dr X. Cahu, Dr C. Dauriac, Dr S. De Guibert, Dr M. Escoffre-Barbe, Dr R. Houot, Dr S. Nimubona; C Henri Becquerel Rouen: Pr S. Lepretre; Institut de Cancérologie de la Loire Saint Priest-en-Jarez: Dr K. Augeul-Meunier, Dr J. Cornillon, Dr D. Guyotat, Dr J. Jaubert, Dr C. Mounier, Dr T. Muron, Dr C. Portois, Dr E. Tavernier; CH Saint Quentin: Dr R. Garidi, Dr S. Legrand ; CHU Toulouse : Dr L. Ysebaert, Dr L. Oberic, Dr C. Recher, Dr G. Laurent; CHU Tours: Dr C. Dartigeas, Dr L. benboubker, Pr P. Colombat, Dr E. Gyan, Dr S. Lissandre, Dr M. Delain; CHU Nancy: Pr P. Feugier; CH Vannes: Dr H. Jardel, Dr P. Godmer.

### **Flow cytometry minimal residual disease investigators**

L. Campos C. Aanei and F. Solly (CHU, Saint-Etienne, France) ; A. Dahmani (CHU Avicenne, Bobigny, France) ; M. Le Garff-Tavernier and C. Quiney (CHU, Pitié-Salpêtrière, Paris, France) ; M. Ticchioni (CHU, Nice, France)

### **Patients**

140 treatment-naïve patients (aged 18-65 years) diagnosed with confirmed Binet stage C or active Binet stages A or B CLL according to IWCLL 2008 criteria has included.<sup>1</sup> An additional inclusion criterion was the absence of 17p deletion, assessed by FISH (<10% positive nuclei). Patients with abnormal renal function with creatinine clearance < 60 ml/min calculated according to the Cockcroft and Gault formula were excluded. Each patient provided a written informed consent before

enrolment and the study was registered on ClinicalTrials.gov with the number NCT 01370772. The study was approved by the institutional ethics committee of each participating center according to the principles of the Declaration of Helsinki. Patients were stratified according to *IGHV* mutational status, FISH analysis (11q deletion or not) and were randomly assigned in one-to-one ratio to receive either 6 cycles of standard chemoimmunotherapy FCR (intravenous RTX 375 mg/m<sup>2</sup> for the first course, D1 and 500 mg/m<sup>2</sup> for the others, oral fludarabine 40 mg/m<sup>2</sup>/d D2-4, oral cyclophosphamide 250 mg/m<sup>2</sup>/d D2-4) every 28 days or Dense-FCR with an intensified RTX prephase (500 mg on D0, and 2000 mg on D1, D8 and D15) before the standard FCR treatment starting at D22 (Supplemental Figure 1).

Premedication recommendation before each rituximab infusion: dexchlorpheniramine, Polaramine<sup>®</sup> (one immediate release 2mg-tablet or one intravenous infusion of 5 mg) and paracetamol (1000 mg) 30 minutes before infusion. Any patient considered at risk of an Infusion Related Reaction (IRR), and/or tumour lysis syndrome (TLS) (patients with lymphocytosis > 25 G/L, and/or splenomegaly >5 cm), should receive: (i) appropriate hydration and allopurinol (300 mg per os once daily) 48 to 72 hours prior to initiating treatment and thereafter until the risk of the IRR/TLS is ruled out; (ii) prednisone/prednisolone (100 mg intravenous) used 30 min prior to start infusion. No specific premedication before dose dense RTX was recommended (Dense-FCR arm).

Patients were assessed 9 months after the first course of FCR in the two arms (M9) and at least 3 months after the end of treatment whatever the number of cycles. All CT-scans were centrally reviewed for response assessment. According to IWCLL 2008 guidelines, the complete remission patients group includes patients in complete remission with incomplete bone marrow recovery.<sup>1</sup>

### **CD20 expression cell detection**

CD20 expression was quantified using the commercial kit QuantiBRITETM CD20PE (Ratio 1:1) according to manufacturer's recommendations (BD Biosciences, Le Pont-de-Claix, France). Calibration and quantification were performed using a FACSCANTO II cytometer (BD, Biosciences, San Jose, CA, USA).

Initial cytometer setup was performed to allow the study of CD20 expression on T-lymphocytes as negative control, normal B-cells as positive control and CLL cells. Then fluorescence target values were determined for PE channel using 8-peak Rainbow bead calibration particles (Spherotech, Lake Forest IL, USA) and a calibration curve for CD20 QuantiBRITETM assay was established based upon these settings. Before making any new calibration curve, the cytometer setup was adjusted to reproduce the initial settings using the same lot of 8-peak Rainbow bead calibration particles. Supplementary Figure 1 shows representative cases of CD20 expression on CLL cells. By using a

calibration curve, the measure of CD20 fluorescence intensity on CLL cells allows calculating the number of equivalent CD20 molecules present at the cell surface.

### **Minimal Residual Disease determination**

An 8-color combination comprising CD19, CD20, CD5, CD43, CD79b, CD81, CD22 and CD3 was performed by flow cytometry (FACSCANTO II cytometer, BD, Biosciences, Le Pont-de-Claix, France) to evaluate the immunophenotypic response of CLL patients in both peripheral blood and bone marrow (BM) at M9, as previously described.<sup>2</sup> Presence of MRD was defined as the detection of one or more CLL cells per 10 000 leukocytes.<sup>1</sup>

### **Tumor burden**

Whole body CT-scan (neck, thorax, abdomen and pelvis) was performed before the beginning of treatment. Three-dimensional tumor volume measurements were performed on the six largest lesions according to a previously described semi-automated accurate measurement technique with thin slicing.<sup>3</sup>

The baseline total quantity of the CD20 antigenic target was estimated on B-cells both in the circulation ( $CD20_{cir}$ ) and in the lymph nodes ( $CD20_{LN}$ ), as follows:

$$CD20_{cir} = CD20 \text{ expression per cell} \times \text{Number of circulating target cells}$$

$$CD20_{LN} = CD20 \text{ expression per cell} \times \text{Number of cells for 6 largest scanned lesions}$$

where CD20 expression per cell is expressed in MESF (Molecules of Equivalent Soluble Fluorophores), number of circulating target cells was determined as follows:

$$\text{Number of circulating target cells} = CD19^+ \text{ cell concentration} \times \text{blood volume}$$

$$CD19^+ \text{ cell concentration} = \text{total lymphocyte concentration} \times \% CD19^+ \text{ cells}$$

Blood volume (L) is calculated according to Pearson et al:<sup>4</sup>

$$\text{Blood volume} = 0.3669 \times (\text{Height})^3 + 0.03219 \times \text{Weight} + 0.6041 \quad (\text{male})$$

$$\text{Blood volume} = 0.3561 \times (\text{Height})^3 + 0.03308 \times \text{Weight} + 0.1833 \quad (\text{female})$$

Number of cells for 6 scanned lesions was assessed as follows:

$$\text{Number of cells for 6 scanned lesions} = \text{volume of 6 scanned lesions (cm}^3\text{)} / \text{CLL lymphocyte volume, where CLL lymphocyte volume is assumed to be 54 fL.}^5$$

### **Exposure to rituximab**

RTX concentration data were available in a total of 118 patients (PK population) from both treatment arms. In these patients, RTX population pharmacokinetic (PK) was assessed using a semi-mechanistic pharmacokinetic model, as previously described.<sup>6</sup> Exposure to RTX was assessed by the area under the concentration-time curve (AUC) from the beginning of treatment to the last concentration

measurement time at M12 (6 months after the end of the FCR treatment,  $AUC_{0-12M}$ ) or D22 (before C1 of FCR treatment in the Dense-FCR arm,  $AUC_{0-22D}$ ). RTX  $AUC_{0-12M}$  and  $AUC_{0-22D}$  values were obtained by integrating the concentrations predicted in the PK model.

### **Statistical analysis**

The primary endpoint of this randomized phase II study was the rate of CR with nMRD as assessed 3 months after the end of treatment. To calculate the number of patients, we used the Simon method in one step with the following hypothesis: in our previous study we observed a complete response (CR) with negative minimal residual disease (nMRD) of 35% in patients having received the combination of fludarabine, cyclophosphamide and rituximab (FCR) at standard dose. We assume an increase of 15% of CR rate with nMRD by using high dose of rituximab. Taking into account a rate of 10% of patients not assessable for response, 140 patients was included in this study, 70 in each arm. Distributions of data were tested with the Shapiro-Wilk test. Chi-squared or Fisher's exact tests were used to compare categorical data. For numerical data, medians were compared using Student's T test or Mann-Whitney's test. Spearman's correlation test was used to assess the association between two numerical variables. The association between covariates and patients' response was assessed using multivariate logistic regression analysis. The receiver operating characteristics (ROC) curve was used to determine the threshold able to predict complete response with BM nMRD associated with the best sensitivity and specificity according to the Youden index.<sup>7</sup> Progression-free survival (PFS) was measured from the date of the initiation of treatment to the date of relapse and/or progression. PFS was estimated using the Kaplan-Meier method and comparisons were made using the log-rank test. Hazard ratios and their 95% confidence intervals in univariate and multivariate analyses were calculated using Cox regression analyses. All statistical analyses were performed at the conventional two-tailed  $\alpha$  level of 0.05 using R software version 3.0.2.10.

## References.

1. Hallek M, Cheson BD, Catovsky D, et al. Guidelines for the diagnosis and treatment of chronic lymphocytic leukemia: a report from the International Workshop on Chronic Lymphocytic Leukemia updating the National Cancer Institute-Working Group 1996 guidelines. *Blood*. 2008;111(12):5446-5456.
2. Lepage S, Lestou R, Dartigeas C, et al. Results of a Phase II Randomizing Intensified Rituximab Pre-Phase Followed By Standard FCR Vs Standard FCR in Previously Untreated Patients with Active B-Chronic Lymphocytic Leukemia (B-CLL). CLL2010FMP (for fit medically patients): A Study of the french Cooperative Group on CLL and WM (FCGCLL/MW) and the "Groupe Ouest-Est d'Etudes Des Leucémies Aigües Et Autres Maladies Du sang" (GOELAMS). Poster. 2014;3329.
3. Nougaret S, Jung B, Aufort S, Chanques G, Jaber S, Gallix B. Adrenal gland volume measurement in septic shock and control patients: a pilot study. *Eur Radiol*. 2010;20(10):2348-2357.
4. Pearson TC, Guthrie DL, Simpson J, et al. Interpretation of measured red cell mass and plasma volume in adults: Expert Panel on Radionuclides of the International Council for Standardization in Haematology. *Br J Haematol*. 1995;89(4):748-756.
5. Alexander HD, Markey GM, Nolan RL, Morris TC. Cell sizing in chronic lymphoproliferative disorders: an aid to differential diagnosis. *J Clin Pathol*. 1992;45(10):875-879.
6. Tout M, Gagez AL, Lepage S, et al. Influence of FCGR3A-158V/F Genotype and Baseline CD20 Antigen Count on Target-Mediated Elimination of Rituximab in Patients with Chronic Lymphocytic Leukemia: A Study of FILO Group. *Clin Pharmacokinet*. 2017;56(6):635-647.
7. Youden WJ. Index for rating diagnostic tests. *Cancer*. 1950;3(1):32-35.
8. Cheson BD, Horning SJ, Coiffier B, et al. Report of an international workshop to standardize response criteria for non-Hodgkin's lymphomas. NCI Sponsored International Working Group. *J Clin Oncol*. 1999;17(4):1244.

| Number of SAE per patient<br>(grade >3), n (%) | Prephase              | FCR             |                 |                       |
|------------------------------------------------|-----------------------|-----------------|-----------------|-----------------------|
|                                                | Dense-FCR arm<br>n=68 | Cohort<br>n=137 | FCR arm<br>n=69 | Dense-FCR arm<br>n=68 |
| IRR                                            | 2 (3)                 | -               | 0               | -                     |
| <b>Hematological</b>                           |                       |                 |                 |                       |
| Anemia                                         | 3 (4)                 | 19 (14)         | 8 (12)          | 11 (16)               |
| Neutropenia                                    | 6 (9)                 | 88 (64)         | 40 (58)         | 48 (71)               |
| Thrombocytopenia                               | 3 (4)                 | 29 (21)         | 12 (17)         | 17 (25)               |
| Infection                                      | 0                     | 9 (7)           | 5 (7)           | 4 (6)                 |
| General                                        | 2 (3)                 | 25 (18)         | 12 (17)         | 13 (19)               |

**Supplemental Table 1. List of grade 3/4 adverse events during the treatment period in ITT population (n=137)**

Abbreviations: SAE, severe adverse event; n, number; IRR, infusion-related reaction.



|                                              | OR (95% CI)       | p     |
|----------------------------------------------|-------------------|-------|
| Age (years)                                  | 1.03 (0.97-1.10)  | 0.409 |
| Women                                        | 1.06 (0.43-2.81)  | 0.906 |
| Binet stage C*                               | 0.19 (0.04-0.60)  | 0.010 |
| <i>IGHV</i> unmutated                        | 0.56 (0.25-1.28)  | 0.171 |
| <b>Cytogenetic abnormalities</b>             |                   |       |
| Del(13q)                                     | 1.69 (0.69-4.33)  | 0.257 |
| Del(11q)                                     | 0.97 (0.32-2.64)  | 0.958 |
| Trisomy 12                                   | 4.74 (1.06-24.93) | 0.045 |
| Lymphocytes (G/L)                            | 0.99 (0.99-1.00)  | 0.062 |
| $\beta$ 2 microglobulin (mg/L)               | 0.74 (0.51-1.00)  | 0.086 |
| MESF CD20 (per cell) ( $\times 10^3$ )       | 1.00 (0.98-1.03)  | 0.715 |
| <b>CT-Scan characteristics**</b>             |                   |       |
| Cheson (mm <sup>2</sup> ) ( $\times 10^3$ )  | 0.97 (0.84-1.08)  | 0.627 |
| Volume (cm <sup>3</sup> ) ( $\times 10^2$ )  | 0.92 (0.56-1.34)  | 0.689 |
| Number of lesions                            | 1.25 (0.84-1.48)  | 0.369 |
| <b>Tumor burden•</b>                         |                   |       |
| CD20 <sub>LN</sub> ( $\times 10^{15}$ )      | 1.01 (0.98-1.03)  | 0.666 |
| CD20 <sub>circ</sub> ( $\times 10^{15}$ )    | 0.90 (0.76-1.01)  | 0.135 |
| CD20 <sub>patient</sub> ( $\times 10^{15}$ ) | 1.00 (0.97-1.02)  | 0.834 |
| <i>FCGR3A</i> -158VV                         | 2.85 (0.74-11.01) | 0.118 |
| Treatment arm                                | 1.04 (0.46-2.33)  | 0.927 |

**Supplemental Table 2. Univariate logistic regression response analysis in ITT population (n=137)**

Patients not belonging to complete response with bone marrow undetectable minimal residual disease group were used as the odds ratio reference group. \*None of patients in CR with BM nMRD were in Binet stage A. \*\*CT-scan characteristics included classical Cheson volume determination according to Cheson standardized guidelines of radiology for non-Hodgkin's lymphomas<sup>8</sup> and a three-dimensional tumor volume described in methods section. •Tumor burden for a patient ( $CD20_{patient}$ ) is composed of the lymph node ( $CD20_{LN}$ ) and the circulating B cells ( $CD20_{cir}$ ) part, evaluated as explained in methods section. Abbreviations: OR, odds ratio; CI, confidence interval; *IGHV*, immunoglobulin heavy chain variable; MESF, molecules of equivalent soluble fluorochrome; nd, not determined;  $CD20_{LN}$ , lymph nodes CD20 antigen;  $CD20_{cir}$ , CD20 antigen count on circulating B cells;  $CD20_{patient}$ , patient's CD20 antigen count.

| A                                                       | HR (95% CI)       | p         |
|---------------------------------------------------------|-------------------|-----------|
| Age $\geq$ 58.34 (years), n=67                          | 1.03 (0.54-1.99)  | 0.923     |
| Male Gender, n=100                                      | 1.06 (0.50-2.26)  | 0.877     |
| Binet stage AB, n=101                                   | 0.80 (0.39-1.63)  | 0.543     |
| <i>IGHV</i> unmutated, n=82                             | 2.96 (1.29-6.81)  | 0.008     |
| <b>Cytogenetic abnormalities</b>                        |                   |           |
| Del(13q), n=59                                          | 0.63 (0.30-1.32)  | 0.215     |
| Del(11q), n=25                                          | 1.93 (0.90-4.13)  | 0.085     |
| Trisomy 12, n=9*                                        | nc                | 0.058     |
| Lymphocyte count $>$ 74.65 (G/L), n=68                  | 2.63 (1.29-5.35)  | 0.006     |
| $\beta$ 2 microglobulin $>$ 2 (mg/L), n=111             | 2.20 (0.53-9.19)  | 0.266     |
| Treatment arm FCR, n=69                                 | 1.09 (0.57-2.10)  | 0.792     |
| Number of cycles received = 6 cycles, n=111             | 0.94 (0.41-2.15)  | 0.889     |
| MESF CD20 $>$ 9169 (per cell), n=61                     | 0.29 (0.14-0.61)  | $<$ 0.001 |
| <b>CT-Scan characteristics**</b>                        |                   |           |
| Cheson $>$ 3535 (mm <sup>2</sup> ), n=51                | 2.54 (1.22-5.27)  | 0.010     |
| Volume $>$ 51.4 (cm <sup>3</sup> ), n=61                | 3.39 (1.51-7.63)  | 0.002     |
| Number of lesions =6, n=117                             | 3.07 (0.42-22.59) | 0.245     |
| <b>Tumor burden•</b>                                    |                   |           |
| CD20 <sub>LN</sub> $>$ 6.40 $\cdot 10^{15}$ , n=65      | 1.83 (0.74-4.54)  | 0.184     |
| CD20 <sub>cir</sub> $>$ 3.58 $\cdot 10^{15}$ , n=41     | 1.57 (0.78-3.18)  | 0.205     |
| CD20 <sub>patient</sub> $>$ 4.42 $\cdot 10^{15}$ , n=79 | 4.92 (0.67-36.34) | 0.083     |
| <i>FCGR3A</i> -158VV, n=14                              | 0.25 (0.03-1.85)  | 0.144     |

| B                              | AUC (95% CI)           | Threshold              | Sp (%) | Se (%) |
|--------------------------------|------------------------|------------------------|--------|--------|
| MESF CD20 (per cell)           | 0.6880 (0.5817-0.7942) | 9169                   | 68     | 67     |
| <b>CT-Scan characteristics</b> |                        |                        |        |        |
| Cheson (mm <sup>2</sup> )      | 0.6293 (0.5168-0.7417) | 3535                   | 66     | 60     |
| Volume (cm <sup>3</sup> )      | 0.6476 (0.5352-0.7601) | 51.4                   | 60     | 73     |
| <b>Tumor burden</b>            |                        |                        |        |        |
| CD20 <sub>LN</sub>             | 0.5489 (0.4225-0.6753) | 6.40 .10 <sup>15</sup> | 39     | 78     |
| CD20 <sub>cir</sub>            | 0.4986 (0.3724-0.6247) | 3.58 .10 <sup>15</sup> | 63     | 52     |
| CD20 <sub>patient</sub>        | 0.5534 (0.4259-0.6809) | 4.42 .10 <sup>15</sup> | 19     | 96     |

**Supplemental Table 3. Cox analysis for PFS in ITT population (n=137)**

(A) Univariate associations between baseline characteristics and PFS. (B) Parameters of ROC curve constructions. \*Trisomy 12 determination on 92/137 samples. \*\*CT-scan characteristics included classical Cheson volume determination according to Cheson standardized guidelines of radiology for non-Hodgkin's lymphomas<sup>8</sup> and a three-dimensional tumor volume described in methods section. •Tumor burden for a patient (CD20<sub>patient</sub>) is composed of the lymph node (CD20<sub>LN</sub>) and the circulating B cells (CD20<sub>cir</sub>) part, evaluated as explained in methods section. Abbreviations: HR, hazard ratio; CI, confidence interval; *IGHV*, immunoglobulin heavy chain variable; MESF, molecules of equivalent soluble fluorochrome; nc, not converged; CD20<sub>LN</sub>, lymph nodes CD20 antigen count; CD20<sub>cir</sub>, CD20 antigen count on circulating B cells; CD20<sub>patient</sub>, patient's CD20 antigen count; AUC, area under the ROC curve; Sp, specificity; Se, sensitivity; ROC, receiver operating characteristic.

|                                              | PK Cohort (n=118) |                       | ITT Cohort (n=137) |                       | P     |
|----------------------------------------------|-------------------|-----------------------|--------------------|-----------------------|-------|
|                                              | n (%)             | Median (IQR)          | n (%)              | Median (IQR)          |       |
| Age (years)                                  | †                 | 58 (52-62)            | †                  | 58 (53-62)            | 0.968 |
| women                                        | 30 (25)           | -                     | 37 (27)            | -                     | 0.887 |
| Binet stage                                  |                   |                       |                    |                       | 0.888 |
| A                                            | 2 (2)             | -                     | 3 (2)              | -                     |       |
| B                                            | 84 (71)           | -                     | 98 (72)            | -                     |       |
| C                                            | 32 (27)           | -                     | 36 (26)            | -                     |       |
| <i>IGHV</i> unmutated                        | 67/114 (59)       | -                     | 82/133 (62)        | -                     | 0.696 |
| Cytogenetic abnormalities                    |                   |                       |                    |                       |       |
| Del(13q)                                     | 53/95 (56)        | -                     | 59/106 (56)        | -                     | 1     |
| Del(11q)                                     | 20/115 (17)       | -                     | 25/134 (19)        | -                     | 0.869 |
| Trisomy 12                                   | 8/82 (10)         | -                     | 9/92 (10)          | -                     | 1     |
| Lymphocyte count (G/L)                       | †                 | 63.00 (26.63-113.00)  | †                  | 74.65 (29.60-114.30)  | 0.808 |
| β2 microglobulin (mg/L)                      | †                 | 2.90 (2.40-3.70)      | 124 (91)           | 3.07 (2.39-4.10)      | 0.494 |
| MESF CD20 (per cell)                         | †                 | 10580 (7095-13980)    | 107 (78)           | 10552 (6577-15240)    | 0.862 |
| CT-Scan characteristics**                    |                   |                       |                    |                       |       |
| Cheson (mm <sup>2</sup> )                    | †                 | 2939 (2146-4885)      | 128 (93)           | 2978 (2196-5044)      | 0.931 |
| Volume (cm <sup>3</sup> )                    | †                 | 47.86 (27.71-88.99)   | 128 (93)           | 47.85 (26.45-95.80)   | 0.952 |
| Tumor burden•                                |                   |                       |                    |                       |       |
| CD20 <sub>LN</sub> (.10 <sup>14</sup> )      | †                 | 102.10 (52.79-167.50) | 99 (72)            | 91.70 (41.50-159.90)  | 0.495 |
| CD20 <sub>circ</sub> (.10 <sup>14</sup> )    | †                 | 29.27 (11.57-55.71)   | 99 (72)            | 30.70 (12.60-50.70)   | 0.849 |
| CD20 <sub>patient</sub> (.10 <sup>14</sup> ) | †                 | 138.80 (76.30-277.10) | 93 (68)            | 134.50 (75.70-260.40) | 0.588 |
| <i>FCGR3A</i> -158VV                         | 13 (11)           | -                     | 14/127 (11)        | -                     | 1     |
| FCR arm                                      | 55 (47)           | -                     | 69 (50)            | -                     | 0.615 |

#### Supplemental Table 4. Comparison of PK (n=118) and ITT (n=137) population

†For the pharmacokinetic population, n=118; intent-to-treat population, n=137. \*MESF CD20 corresponds to the number of CD20 molecules expressed on a CLL cell surface. Quantification is detailed in supplemental methods. \*\*CT-scan characteristics included classical Cheson volume

determination according to Cheson standardized guidelines of radiology for non-Hodgkin's lymphomas<sup>8</sup> and a three-dimensional tumor volume described in methods section. •Tumor burden for a patient ( $CD20_{patient}$ ) is composed of the lymph node ( $CD20_{LN}$ ) and the circulating B cells ( $CD20_{cir}$ ) part, evaluated as explained in methods section.

Abbreviations: PK, pharmacokinetic; ITT, intent-to-treat; n, number; IQR, interquartile range; *IGHV*, immunoglobulin heavy chain variable; MESF, molecules of equivalent soluble fluorochrome;  $CD20_{LN}$ , lymph nodes CD20 antigen count;  $CD20_{cir}$ , CD20 antigen count on circulating B cells;  $CD20_{patient}$ , patient's CD20 antigen count.

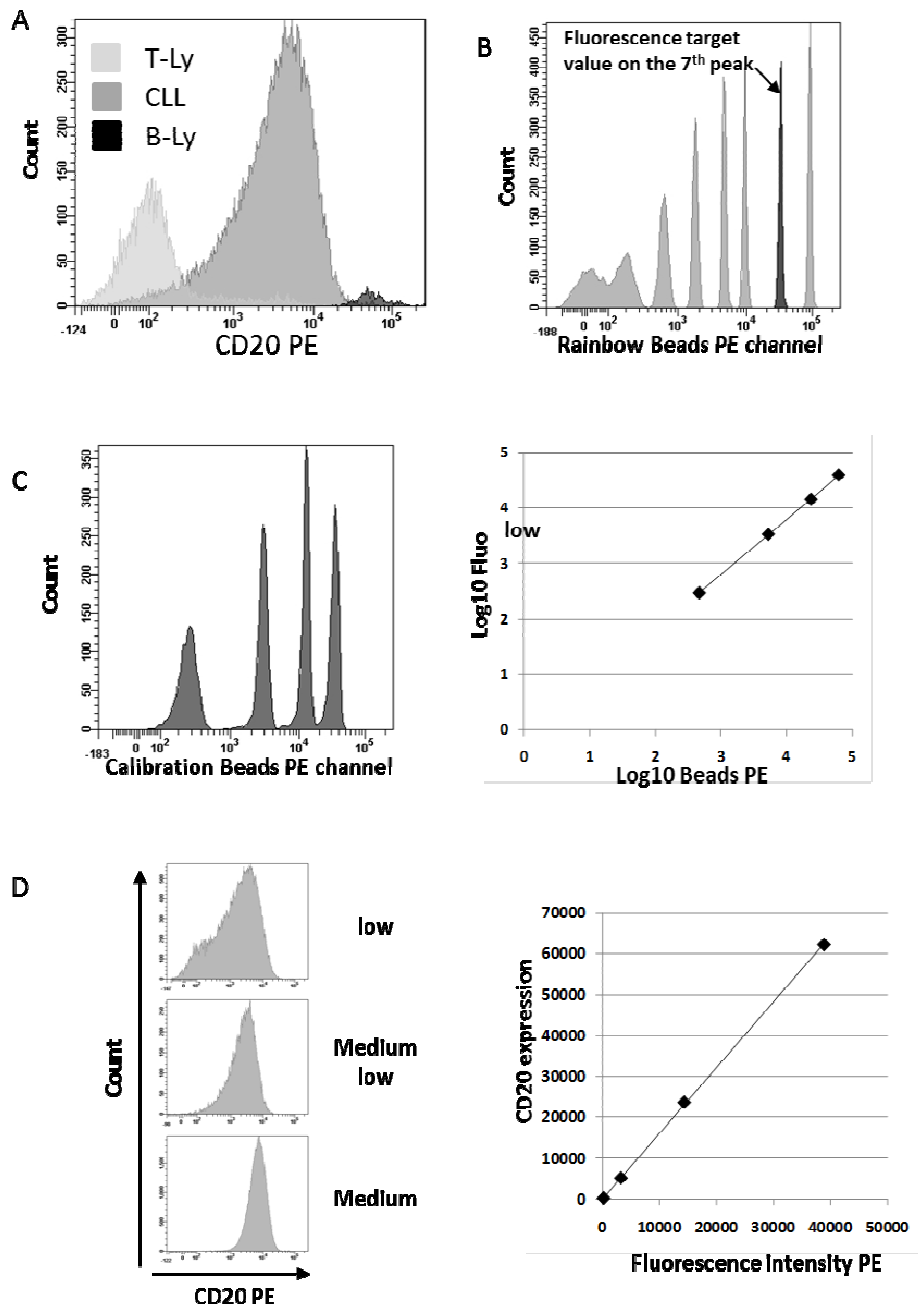

**Supplemental Figure 1. Study of CD20 expression on CLL cells using QuantiBRITE™ CD20PE commercial kit.**

Panel A shows the initial setting for the study of CD20 expression on T-lymphocytes ■, normal B-cells ■, and CLL cells ■. Panel B shows the determination of the fluorescence target value for PE channel using Rainbow beads. Panel C shows the use of the calibration beads to measure the fluorescence intensity of the beads and construct the calibration curve. Panel D shows representative cases of CD20 labeling on CLL cells. The determination of the fluorescence intensity and the use of an antiCD20 reagent certified with a PE to monoclonal antibody ratio of 1:1, allows calculating (with the calibration curve of panel C) the number of equivalent CD20 molecules present at the cell surface.

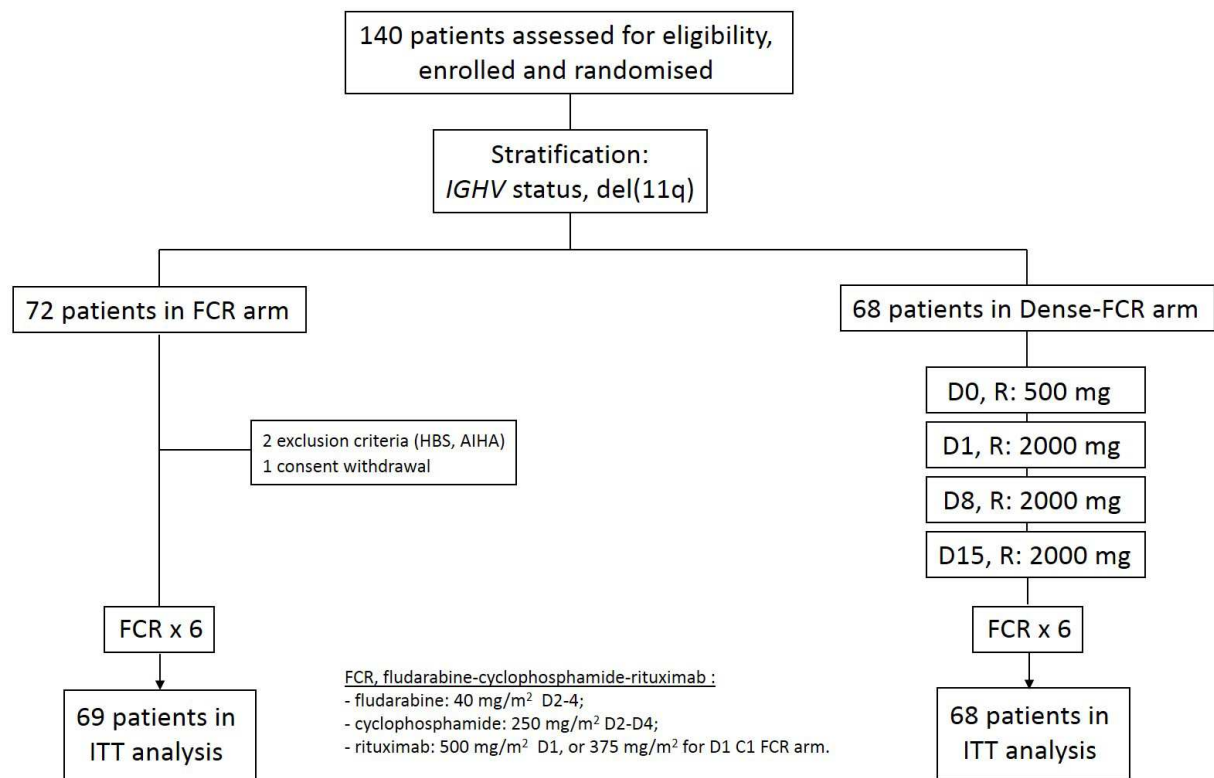

**Supplemental Figure 2. Study design of the CLL2010FMP protocol**

Abbreviations: AIHA, Autoimmune hemolytic anemia; C, Cyclophosphamide; D, Day; F, Fludarabine; HBs, HBs Antigen; ITT, Intent to treat; R, Rituximab.



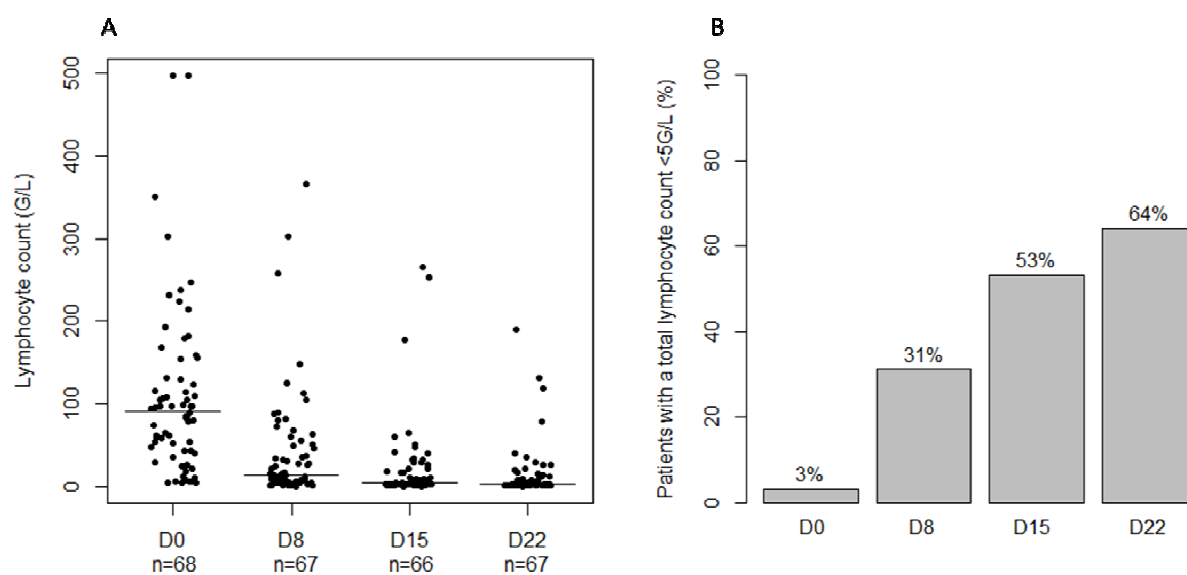

**Supplemental Figure 3. Changes in lymphocyte counts during rituximab pre-phase in the Dense-FCR arm (n=68).**

Total lymphocyte counts at D0 (n=68), D8 (n=67), D15 (n=66) and D22 (n=67) (A). Percentage of patients with a total lymphocyte count  $\leq 5.0$  G/L (B).

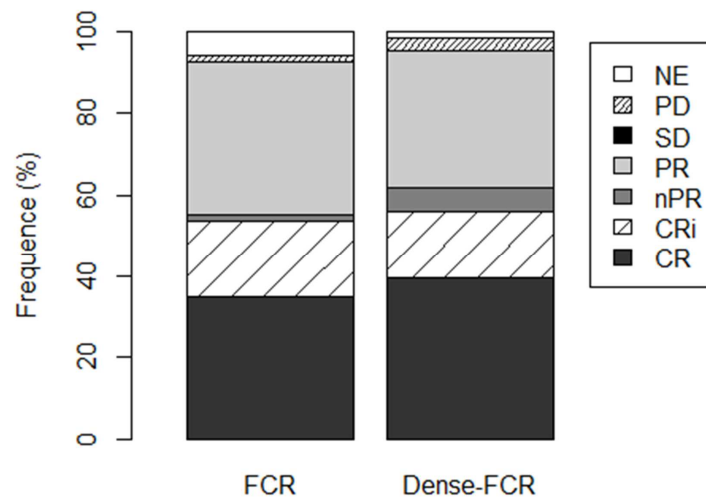

**Supplemental Figure 4. Response rate according to treatment (ITT population, n=137)**

Abbreviations: NE, not evaluable ; PD, progressive disease ; SD, stable disease ; PR, partial response ; nPR, nodular partial response ; CRi, complete response with incomplete bone marrow recovery ; CR, complete response.

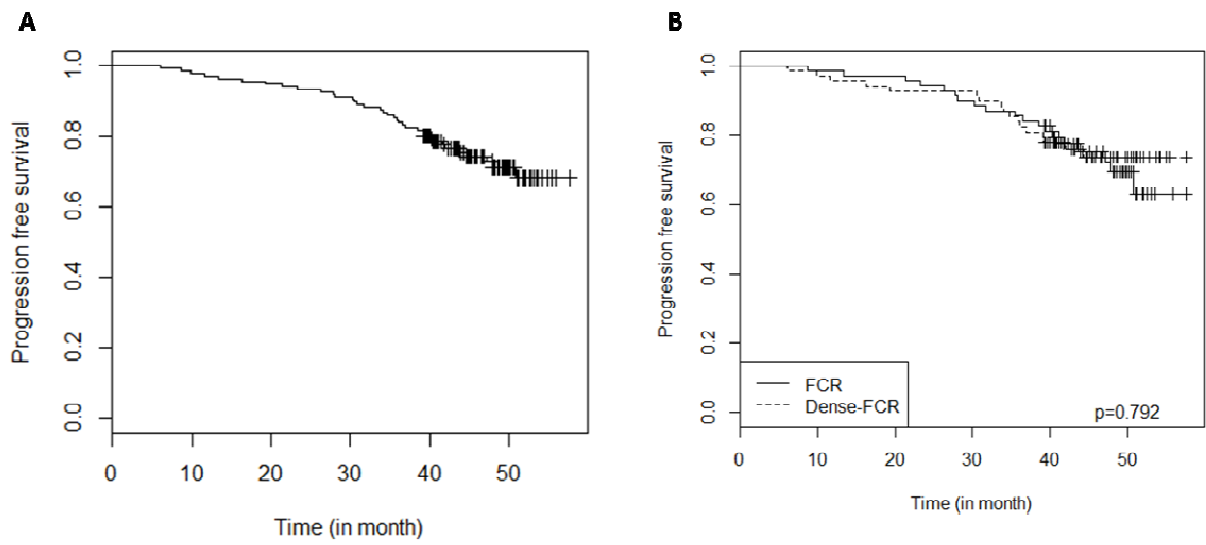

**Supplemental Figure 5. Estimates of PFS curves (ITT population, n=137)**

PFS of the whole cohort (A) and according to treatment arm (B).
